# Supplementary material for: Particle size-dependent flexibility in DUT-8(Cu) pillared layer metal–organic framework
Source: Royal Society of Chemistry journal article supplement (doi:10.1039/d3dt00085k), 2023-01-01
Supplement: d3dt00085k1.pdf [file d3dt00085k1.pdf]

## Supplementary Information

### Particle size dependent flexibility in DUT-8(Cu) pillared layer metal-organic framework

Mariia Maliuta,<sup>a</sup> Irena Senkovska,<sup>\*, a</sup> Vitaliy Romaka,<sup>a, ^</sup> Volodymyr Bon,<sup>a</sup> Ronja Thümmeler,<sup>a, ‡</sup> Sebastian Ehrling,<sup>a, §</sup> Sphi Becker,<sup>a, ¶</sup> Jack Evans,<sup>a, #</sup> and Stefan Kaskel<sup>\*, a</sup>

<sup>a</sup> Chair of Inorganic Chemistry, Technische Universität Dresden, Bergstraße 66, D-01069 Dresden, Germany

Current affiliations:

<sup>^</sup> Leibniz Institute for Solid State and Materials Research Dresden, Helmholtzstraße 20, 01069 Dresden, Germany

<sup>‡</sup> Leibniz-Institute of Polymer Research Dresden, Hohe Str.6, 01069 Dresden, Germany

<sup>§</sup> 3P INSTRUMENTS GmbH & Co. KG, Rudolf-Diesel-Str.12, 85235 Odelzhausen, Germany

<sup>¶</sup> Gymnasium Wilsdruff, An der Schule 9, 01723 Wilsdruff, Germany

<sup>#</sup> The University of Adelaide, Centre for Advanced Nanomaterials and Department of Chemistry, 5000 Adelaide, Australia

- S1. Experimental details
- S2. Synthesis of DUT-8(Cu) in DEF according to Klein *et al.*
- S3. Desolvation
- S4. Crystal structure
- S5. Adsorption behaviour
- S6. Cluster optimisation
- S7. Thermal analysis
- S8. <sup>1</sup>H NMR Spectroscopy

## S1 Experimental details

### S1.1 Reagents and solvents

Copper nitrate trihydrate ( $\geq 99\%$ , AppliChem), 2,6-naphthalene dicarboxylic acid ( $H_2(2,6\text{-ndc})$ , 99%, Sigma Aldrich), 1,4-diazabicyclo-[2,2,2]-octane (dabco, 99%, Sigma Aldrich), hydrochloric acid (37%, AnalaR NORMAPUR or Sigma Aldrich), *N,N*-dimethylformamide (DMF, 99.5%, Fischer Scientific or Sigma Aldrich), methanol (HPLC grade, HiPerSolv CHROMANORM or VWR Chemicals), ethanol (HPLC grade, HiPerSolv CHROMANORM or VWR Chemicals), DCM (Fischer Scientific, 99.5%), acetone ( $\geq 99.5\%$ , Sigma Aldrich), 1-propanol (HPLC grade, HiPerSolv CHROMANORM), 1-butanol (HPLC grade, HiPerSolv CHROMANORM).

### S1.2 Crystal size modulation and synthesis optimisation

In a typical synthesis,  $Cu(NO_3)_2 \cdot 3H_2O$  (0.338 g, 1.4 mmol, 2 eq.), 2,6-naphthalene dicarboxylic acid (0.303 g, 1.4 mmol, 2 eq.), and dabco (0.078 g, 0.07 mmol, 1 eq) were dissolved separately in 5 ml, 15 ml, and 5 ml of DMF, respectively. To suppress fast nucleation, 8.8 ml of HCl solution (1 M in  $H_2O$ ) was added to the reaction mixture. To study the role of alcohols, four different alcohols were used, namely methanol, ethanol, 1-propanol and 1-butanol. In addition, the ageing temperature was varied from 80 °C over 100 °C to 120 °C (Table S1.1). The DMF/methanol ratio was chosen randomly.

Table S1.1. Utilisation of different alcohols for the synthesis of DUT-8(Cu) at different ageing temperatures.

|        | methanol         | ethanol          | 1-propanol       | 1-butanol        |
|--------|------------------|------------------|------------------|------------------|
| 80 °C  | 60 $\mu\text{m}$ | 40 $\mu\text{m}$ | 40 $\mu\text{m}$ | 50 $\mu\text{m}$ |
| 100 °C | 60 $\mu\text{m}$ | 30 $\mu\text{m}$ | 20 $\mu\text{m}$ | 20 $\mu\text{m}$ |
| 120 °C | X                | 20 $\mu\text{m}$ | X                | X                |

X - no product

The evaluation of the resulting materials concerning crystal size was performed by optical microscopy and SEM (Figure S1.2). The highest yield and the largest crystals could be obtained using a DMF/methanol mixture and an ageing temperature of 80 °C. In the next step, the ratio of the starting materials and the solvent was varied.

A variation of the DMF/methanol ratio (batches a-1 - a-3, Table S1.2) leads to the particles up to 100  $\mu\text{m}$  in size, but also to the formation of an additional phase (Figure S 1.1). In the second series of experiments, the dabco content (batches b-1 - b-3, Table S1.2) was varied. The particle size could be further increased using an excess of dabco for the synthesis (Figure S1.2). In addition, the side phase obtained in batches a-1 - a-3 is not present in b-1 - b-3. If the  $H_2(2,6\text{-ndc})$  concentration is varied (batches c-1 - c-4) also large particles (ca. 50  $\mu\text{m}$ , Figure S1.2) can be obtained. However, only when an equimolar ratio is chosen, a phase pure product is obtained. In the final step, the ratio between dabco and  $H_2(2,6\text{-ndc})$  was kept equal and copper was used as a limiting variable (batch d-1). Interestingly, within this experiment, the biggest crystals with a narrow size distribution could be obtained (Figure S 1.2).

Table S1.2. Synthetic parameters for the synthesis of **2** at 80 °C during 48 hours.

| Batch | Cu <sup>2+</sup> / mmol | H <sub>2</sub> (2,6-ndc) / mmol | dabco / mmol | equiv.    | DMF / mL | MeOH / mL |
|-------|-------------------------|---------------------------------|--------------|-----------|----------|-----------|
| a-1   | 0.4                     | 0.4                             | 0.2          | 2:2:1     | 4.5      | 3.5       |
| a-2   | 0.4                     | 0.4                             | 0.2          | 2:2:1     | 6        | 2         |
| a-3   | 0.4                     | 0.4                             | 0.2          | 2:2:1     | 3        | 5         |
| b-1   | 0.4                     | 0.4                             | 0.1          | 2:2:0.5   | 4.5      | 3.5       |
| b-2   | 0.4                     | 0.4                             | 0.3          | 2:2:1.5   | 4.5      | 3.5       |
| b-3   | 0.4                     | 0.4                             | 0.4          | 2:2:2     | 4.5      | 3.5       |
| c-1   | 0.4                     | 0.467                           | 0.2          | 2:2.3:1   | 4.5      | 3.5       |
| c-2   | 0.4                     | 0.33                            | 0.2          | 2:1.65:1  | 4.5      | 3.5       |
| c-3   | 0.4                     | 0.267                           | 0.2          | 2:1.335:1 | 4.5      | 3.5       |
| c-4   | 0.4                     | 0.2                             | 0.2          | 2:1:1     | 4.5      | 3.5       |
| d-1   | 0.2                     | 0.4                             | 0.2          | 1:2:1     | 6.4      | 1.75      |

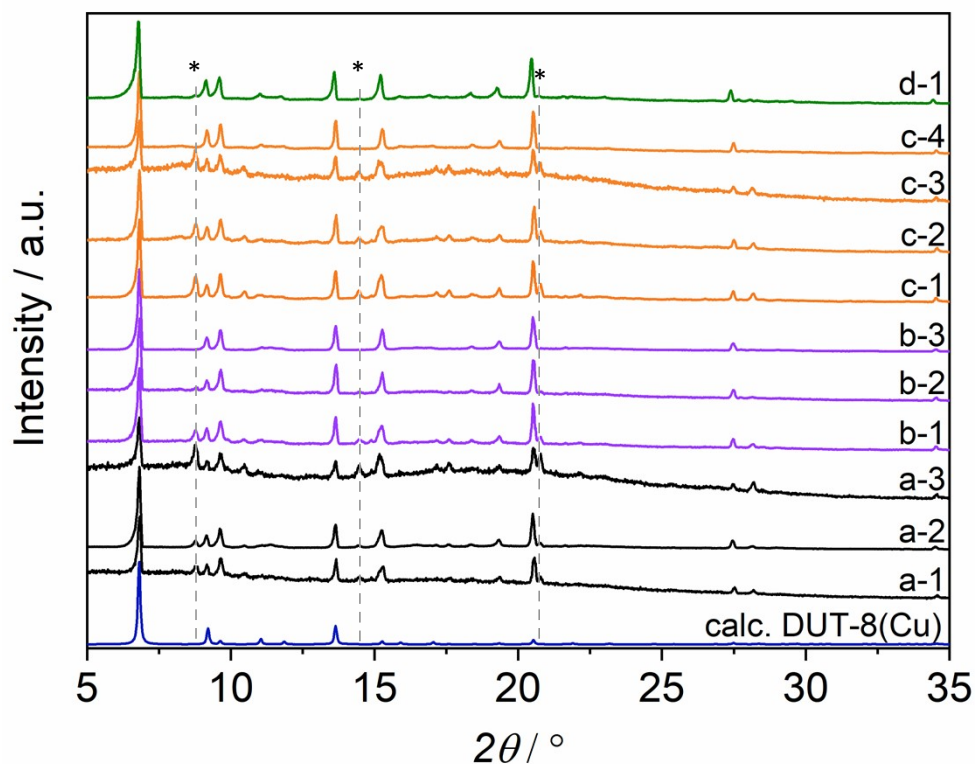

Figure S1.1. PXRD patterns of samples obtained in the synthesis optimisation studies. The peaks of the secondary phases are marked by \*.

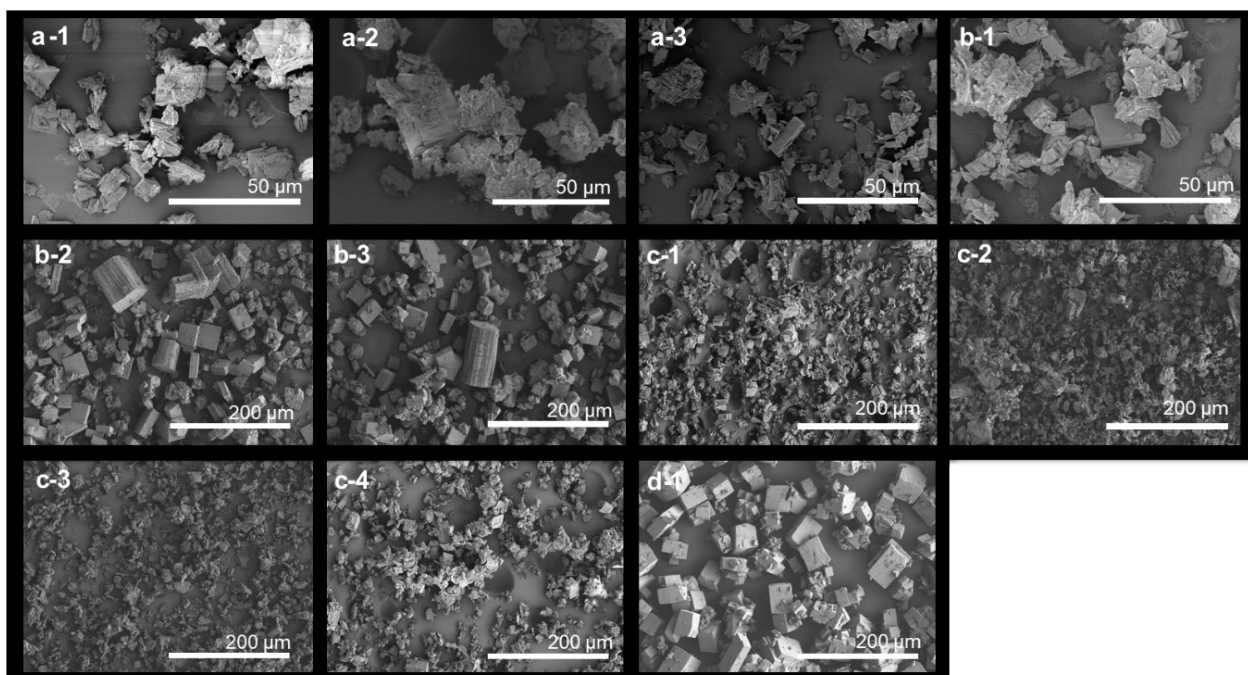

Figure S1.2. SEM images of the crystals obtained in the synthesis optimisation studies.

## S2 Synthesis of DUT-8(Cu) in DEF according to Klein *et al.*<sup>1</sup>

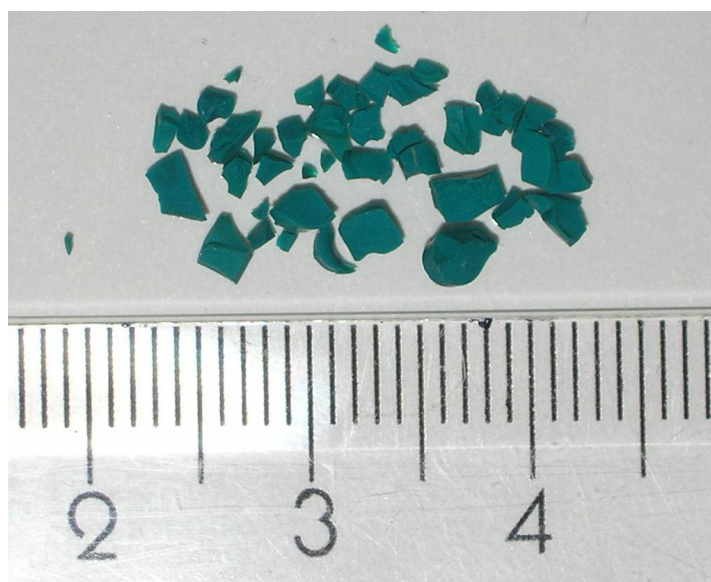

Fig. S2.1. Microscopy image of the DUT-8(Cu) monolith-like solid obtained after drying of the product at 120 °C for 36 h in 2012.<sup>2</sup>

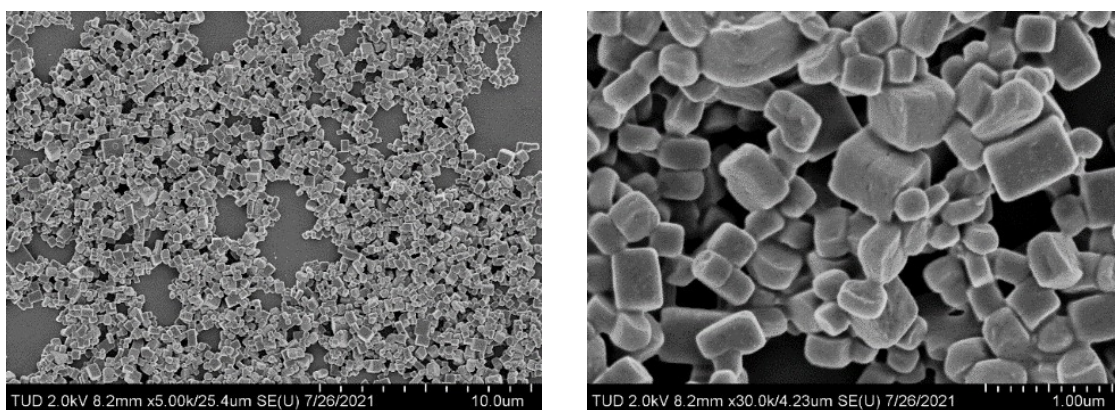

Fig. S2.2. SEM images of the DUT-8(Cu) crystals obtained upon the synthesis in DEF (**1a**), following a synthetic procedure published in 2012.<sup>1</sup>

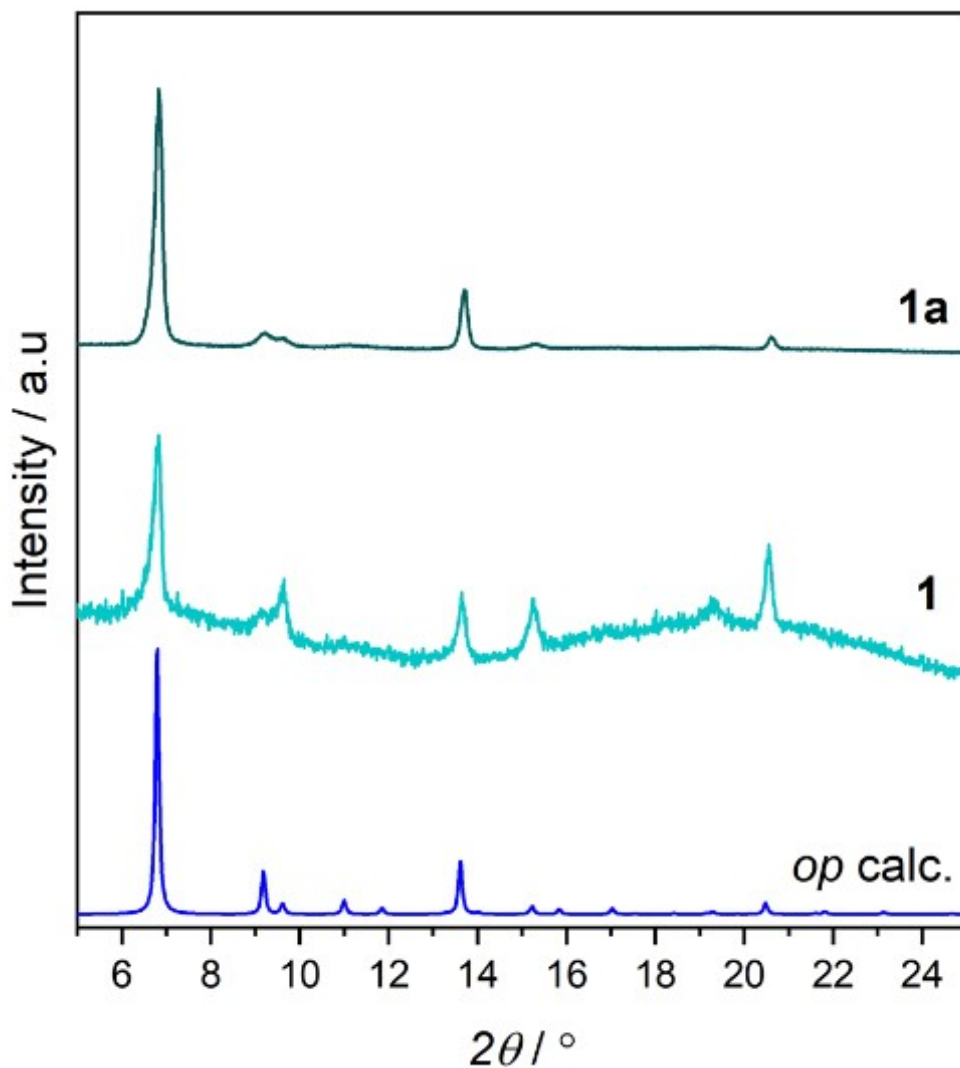

Fig. S2.3. PXRD patterns of **1** and **1a**.

### S3 Desolvation

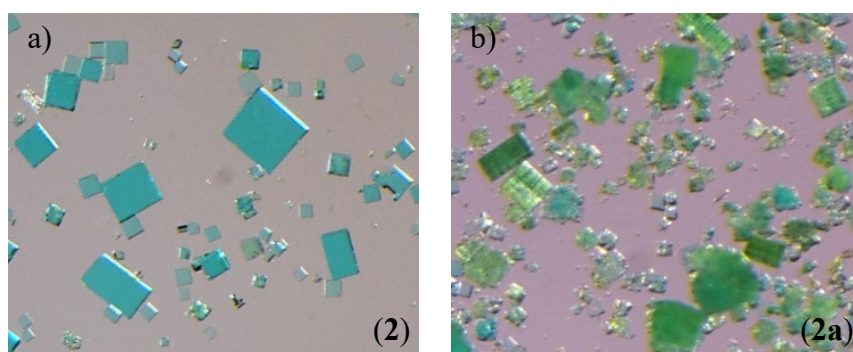

Fig. S3.1. Colour changes of sample **2** upon evacuation: a) before, b) after.

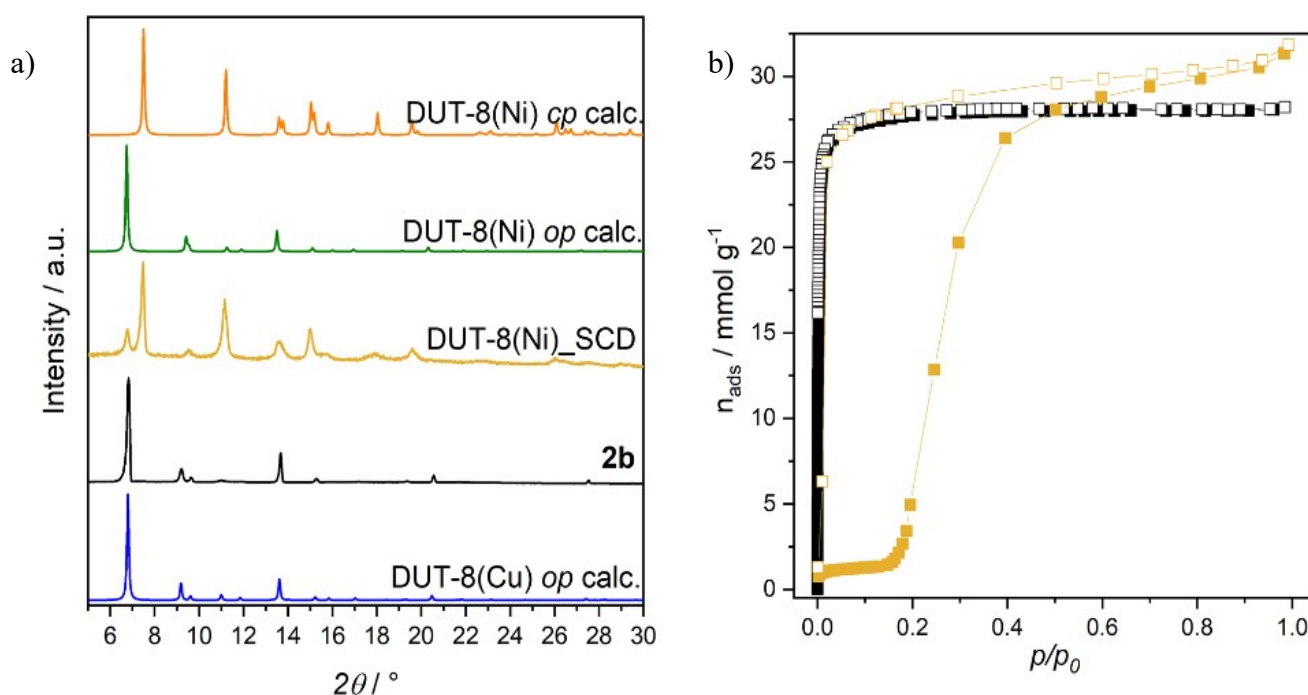

Fig. S3.2. a) PXRD patterns of the macro-sized particles, supercritically dried from acetone: DUT-8(Ni) (yellow) and **2b** (black) in comparison with PXRD calculated for DUT-8(Cu)\_op (blue), DUT-8(Ni)\_op (green) and DUT-8(Ni)\_cp (orange); b) N<sub>2</sub> physisorption at 77 K on macro-sized DUT-8(Ni) particles supercritically dried from acetone (yellow) and **2b** (black). Solid symbols – adsorption, empty symbols – desorption.

As it can be seen from Figure 3.2, the same desolvation procedure applied to the macro-sized DUT-8(*M*) particles containing Cu or Ni results in different phases: mainly cp phase of DUT-8(Ni) and pure op phase of DUT-8(Cu).

## S4 Crystal structure

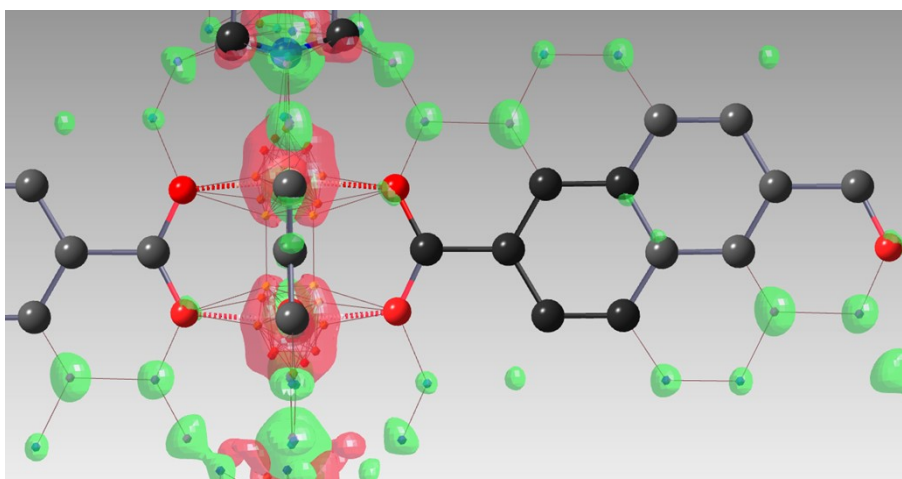

Figure S4.1 Difference Fourier map of the DUT-8(Cu) single crystal indicates localised maxima of the electron density (green) in addition to the main structural motif of the linker and cluster (in black). When connected (thin lines), they resemble a different linker orientation and a disorder along the *c*-axis.

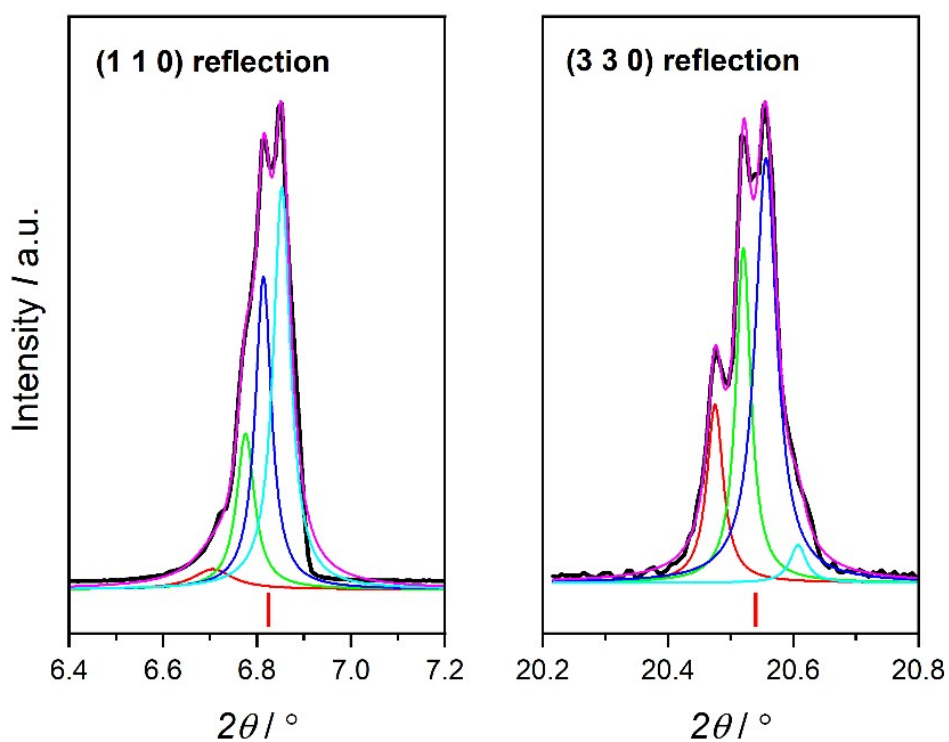

Figure S4.2. Diffraction peaks splitting in **2b**.

## S5 Adsorption behaviour

Table S5.1. Adsorption characteristics of the investigated samples.\*

| Sample name | $n_{\text{ads}}(\text{N}_2, 77\text{K}),$<br>$\text{mmol g}^{-1}$ | $\alpha_{\text{max}}^{**}$ | $n_{\text{ads}}(\text{CO}_2, 195\text{K}),$<br>$\text{mmol g}^{-1}$ | $\alpha_{\text{max}}$ |
|-------------|-------------------------------------------------------------------|----------------------------|---------------------------------------------------------------------|-----------------------|
| <b>1a</b>   | 29.3                                                              | 1                          | 23.47                                                               | 0.93                  |
| <b>2a</b>   | 9.82                                                              | 0.33                       | 9.27                                                                | 0.37                  |
| <b>2b</b>   | 28.2                                                              | 0.96                       | 22.11                                                               | 0.88                  |

\*\*  $\alpha_{\text{max}} = n_{\text{ads}}(\text{experimental}) / n_{\text{ads}}(\text{theoretical})$ , n – amount of substance adsorbed.

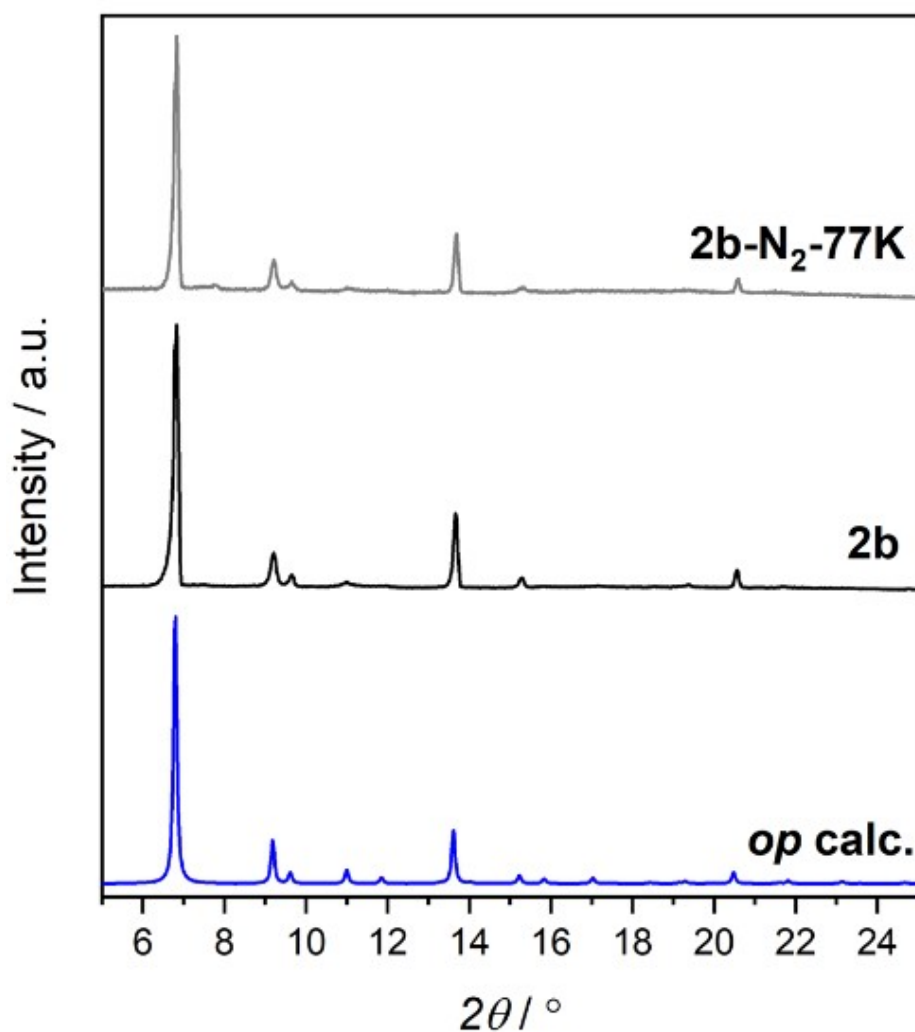

Fig. S5.1. PXRD patterns of **2b** before (black) and after N<sub>2</sub> physisorption at 77 K (gray).



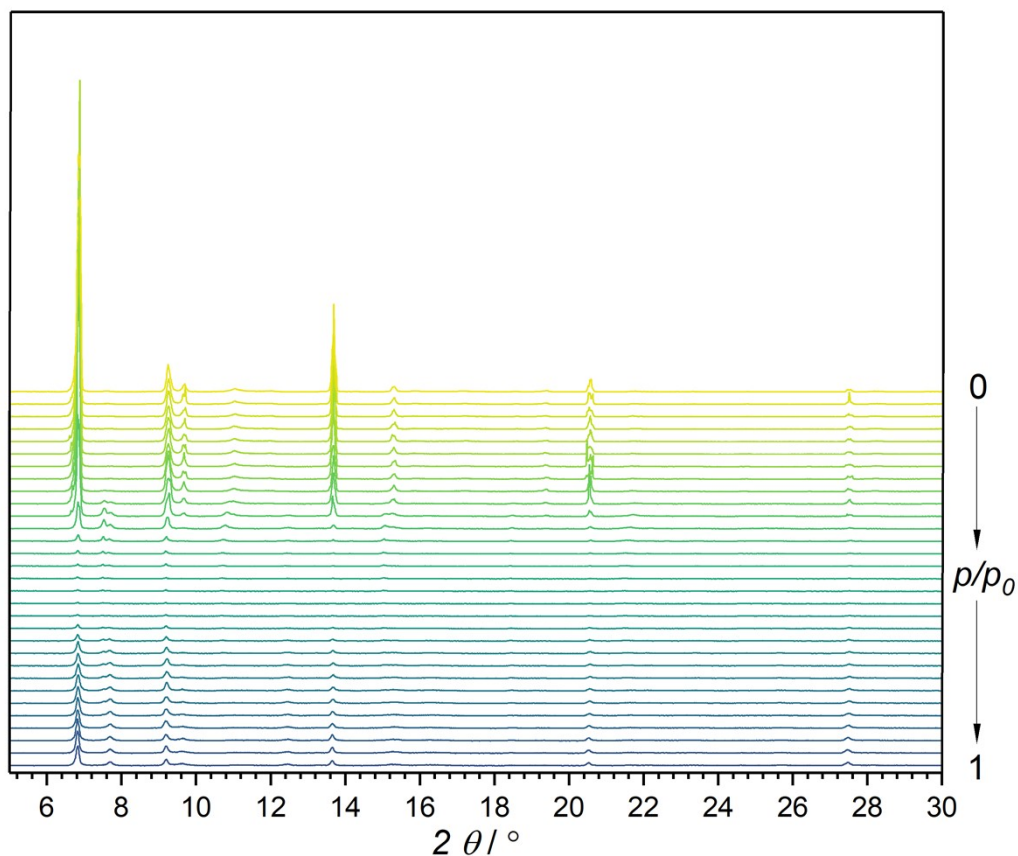

Fig. S5.2. PXRD patterns collected *in situ* upon CO<sub>2</sub> adsorption at 195 K on **2b**.

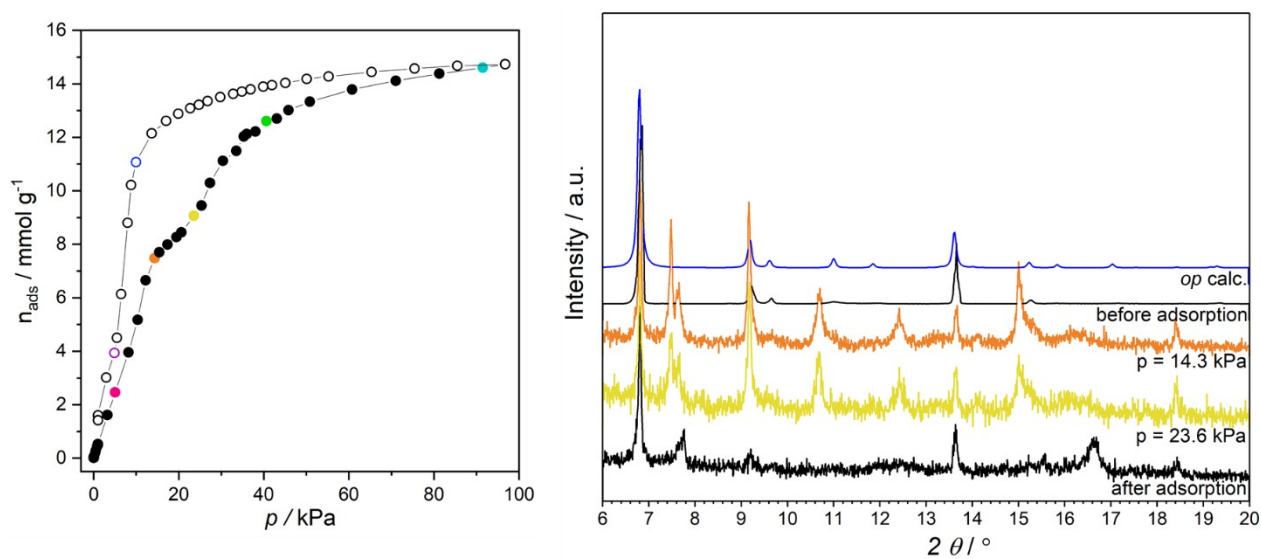

Fig. S5.3. *In situ* CO<sub>2</sub> physisorption isotherm at 195 K and some selected PXRD patterns for **2b**.

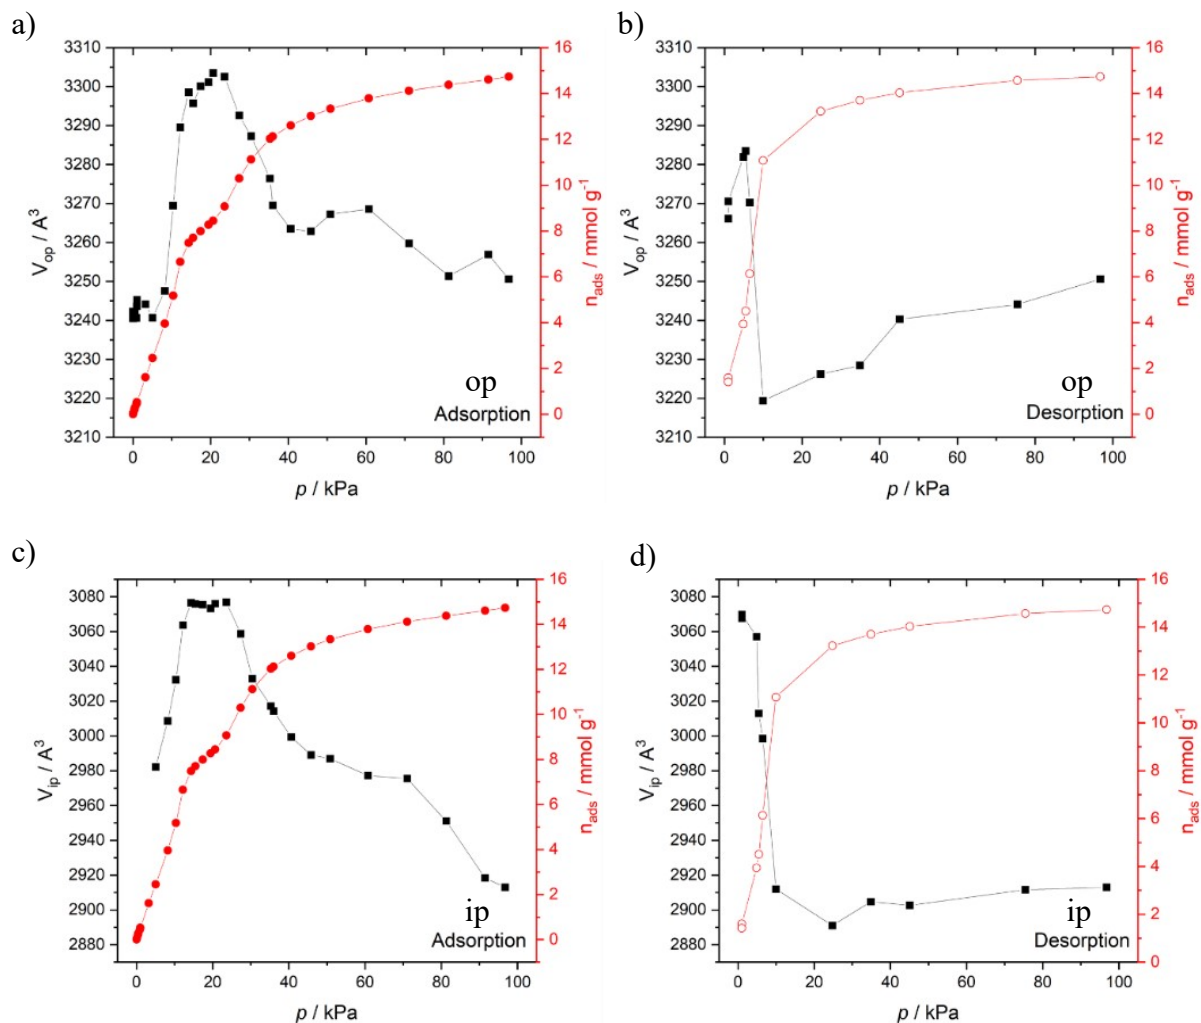

Fig. S5.4. Unit cell volume change of the open pore (op) and intermediate pore (ip) phases upon adsorption (a, c) and desorption (b, d) of CO<sub>2</sub> at 195 K, performed on **2b**.

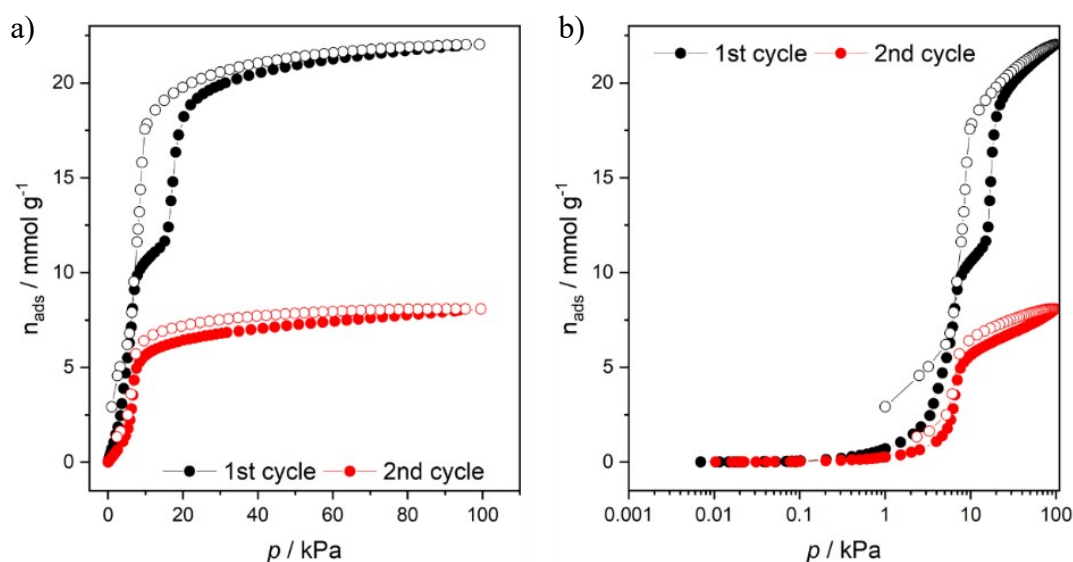

Fig. S5.5. Cyclic adsorption/desorption of CO<sub>2</sub> at 195K for **2b**: (a) linear scale; (b) logarithmic scale. Black – 1<sup>st</sup> adsorption/desorption cycle, red – 2<sup>nd</sup> adsorption/desorption cycle. Solid symbols – adsorption, empty symbols – desorption.

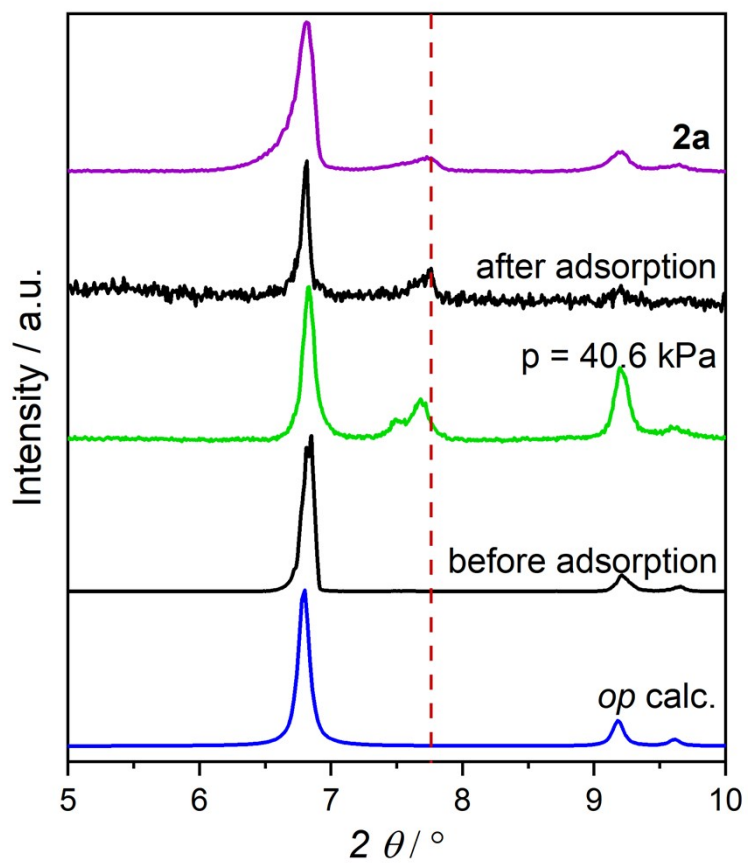

Fig. S5.6. PXRD patterns of: **2b** at 298 K before *in situ* adsorption were measured (black) **2b** loaded with CO<sub>2</sub> at 195 K at  $p = 40.6$  kPa (green), **2b** evacuated at 298 K after CO<sub>2</sub> adsorption/desorption (black), of **2a** (violet). Red line marks the position of the peak of the new phase.

## S6 Cluster optimisation

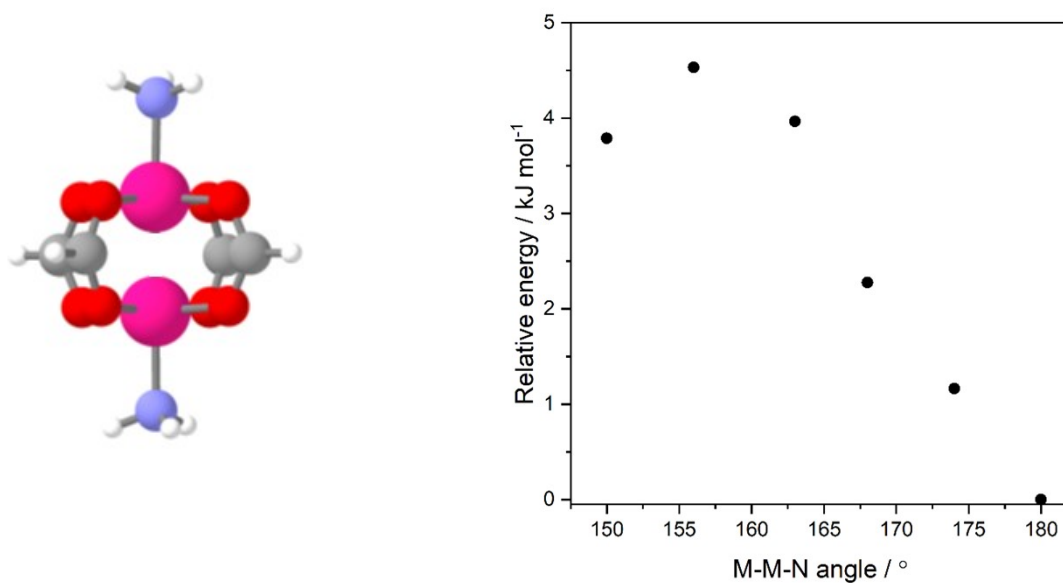

Fig. S6.1 Structure of the Cu paddle wheel cluster molecular analogue (left). The constrained geometry scans of the Cu-Cu-N angles in the paddle wheel cluster (right).

## S7 Thermal analysis

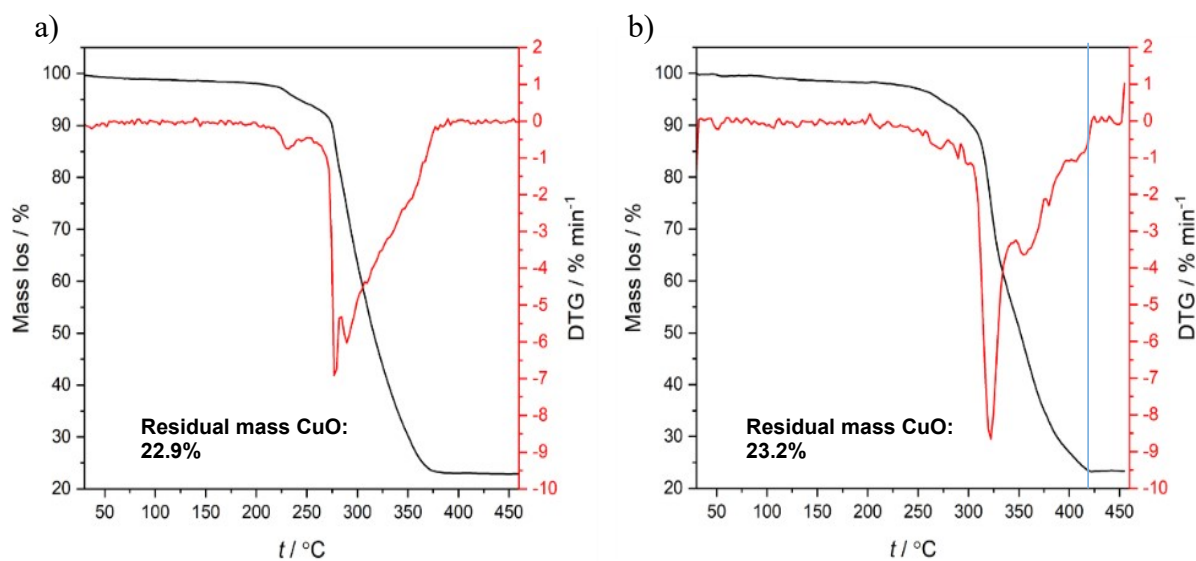

Fig. S7.1 Thermogravimetric analysis (black) / differential thermogravimetric analysis (red) curves of the **1a** (a) and **2b** (b).

### *In situ* thermo-PXRD

Thermo-PXRD measurements were performed on an Empyrean diffractometer (PANALYTICAL GmbH) equipped with a high-temperature chamber in the temperature range of 298 - 723 K with a heating rate of 5 K min<sup>-1</sup> under nitrogen flow. The temperature steps are 25 K and the equilibration time at a given temperature is 30 min. The powder patterns were taken in reflection mode using copper K $\alpha_1$  radiation and a wavelength of 1.5406 Å.

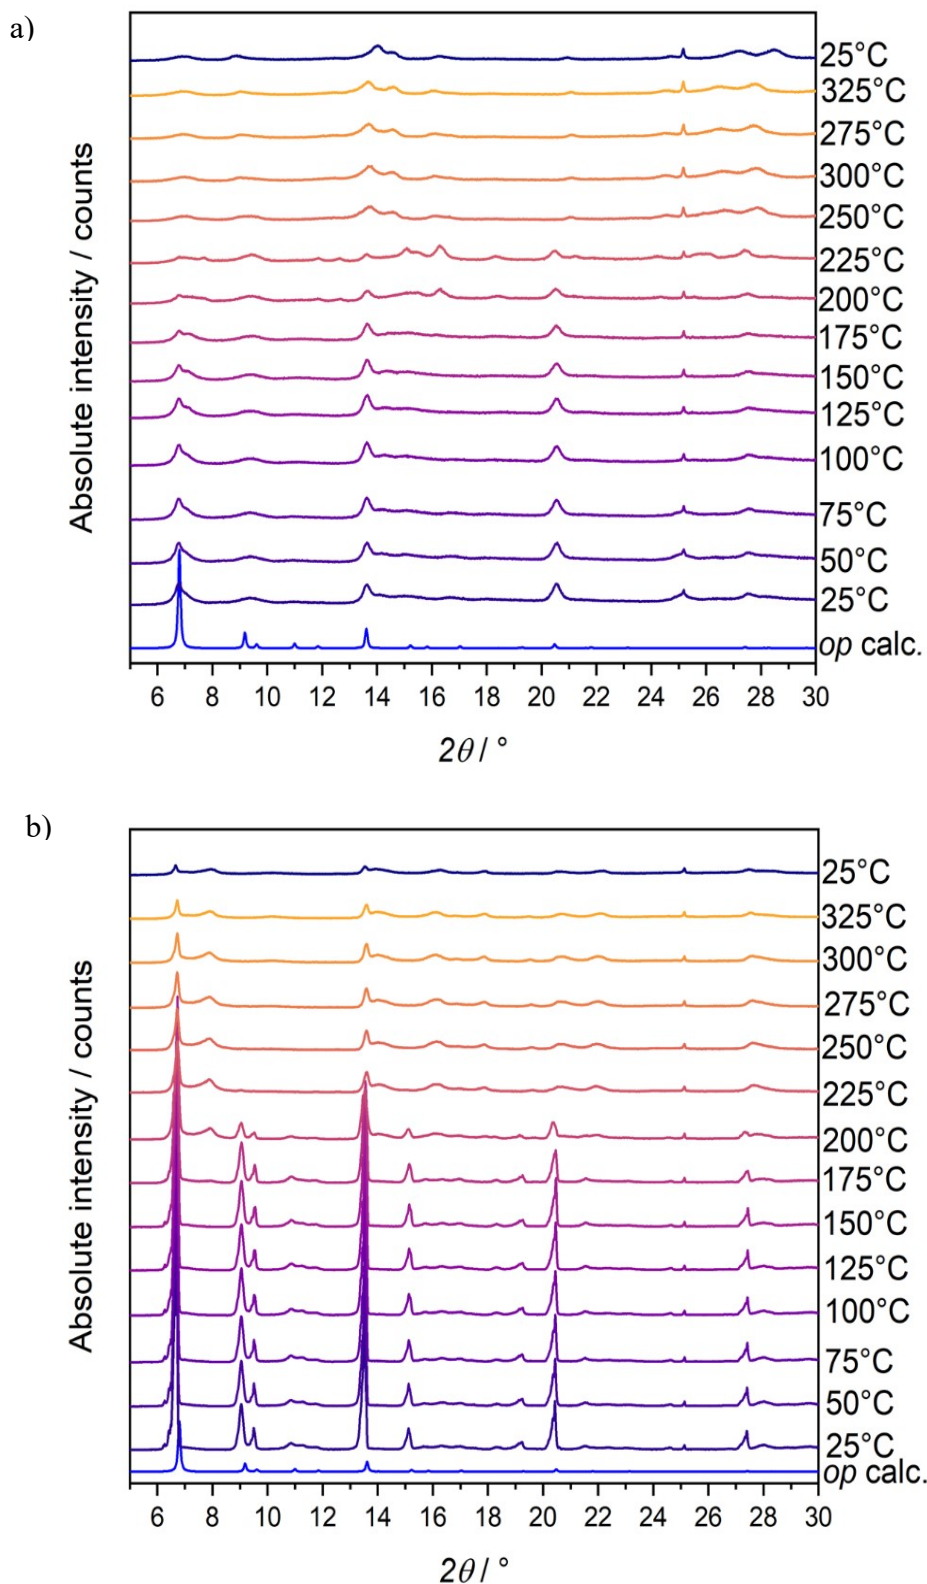

Figure S7.2. Thermo-PXRD patterns of **1a** (a) and **2a** (b) collected upon heating in an inert gas atmosphere (N<sub>2</sub> flow).

Table S7.1 Ratio of 2,6-ndc to dabco in **1a** and **2b** found after thermal treatment in the inert gas atmosphere at elevated temperatures. The ratios were calculated from  $^1\text{H}$  NMR spectra obtained from the digested samples.

| 2,6-ndc:<br>dabco | Initial | 200 °C  | 240 °C  | 300 °C  | 340 °C  | Vacuum<br>160 °C |
|-------------------|---------|---------|---------|---------|---------|------------------|
| <b>1a</b>         | 1:0.95  | 1:0.723 | 1:0.597 | 1:0.306 | 1:0.291 |                  |
| <b>2b</b>         | 1:0.99  | 1:0.849 | 1:0.417 | 1:0.427 | 1:0.243 | 1:0.96           |

### S8 $^1\text{H}$ NMR spectroscopy

Before measurements, the samples **1a**, **2a** and **2b** were digested in the mixture of DMSO- $d_6$  (0.6 ml) and deuterium chloride solution (2 drops) under ultrasonication. The spectra were measured using the Bruker spectrometer at 300 MHz.

Based on the chemical formula of the DUT-8(Cu) ( $[\text{Cu}_2(2,6\text{-ndc})_2\text{dabco}]_n$ ), the theoretical ratio of the peaks at 8.65 ppm (2H, 2,6-naphthalene dicarboxylate) and 3.55 ppm (12H, dabco) of the linker to pillar should be 1:3.

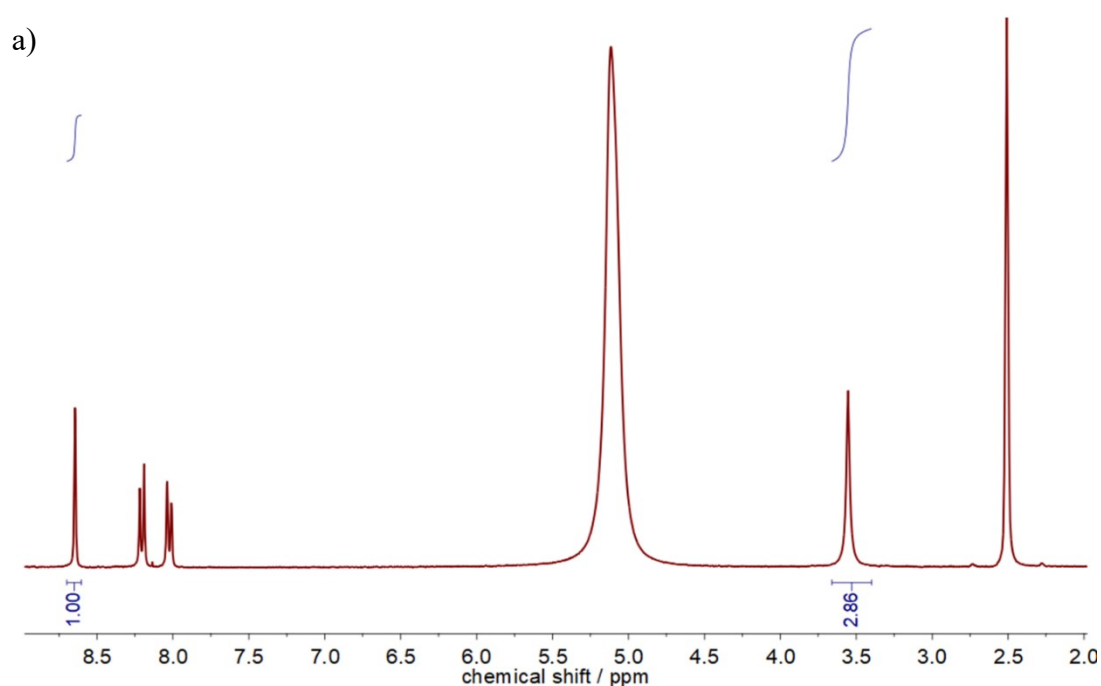

Fig. S8.1 a)  $^1\text{H}$  NMR spectra of **1a**.

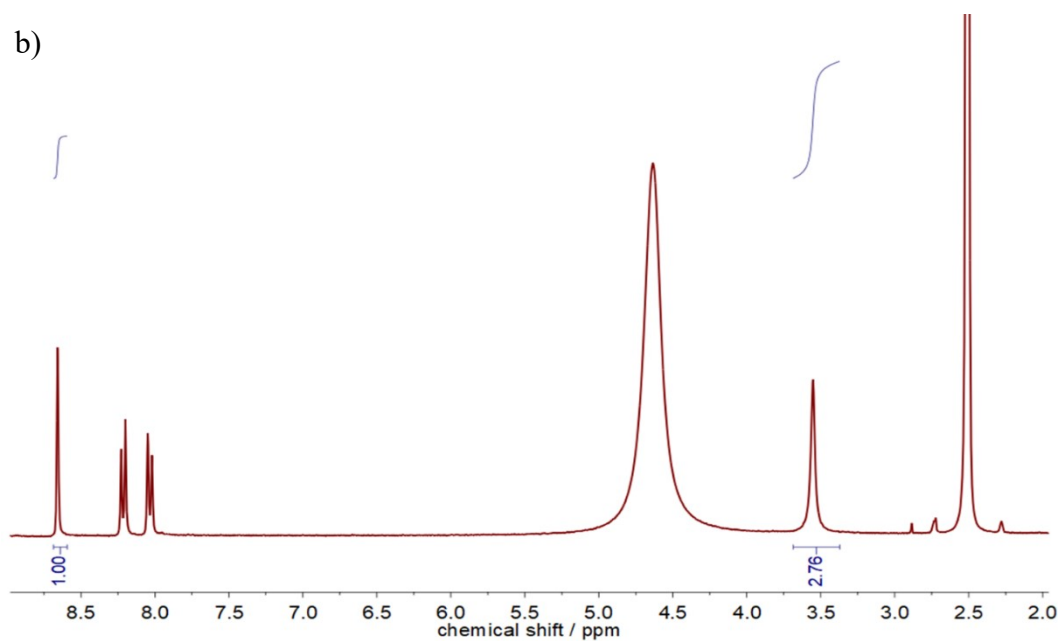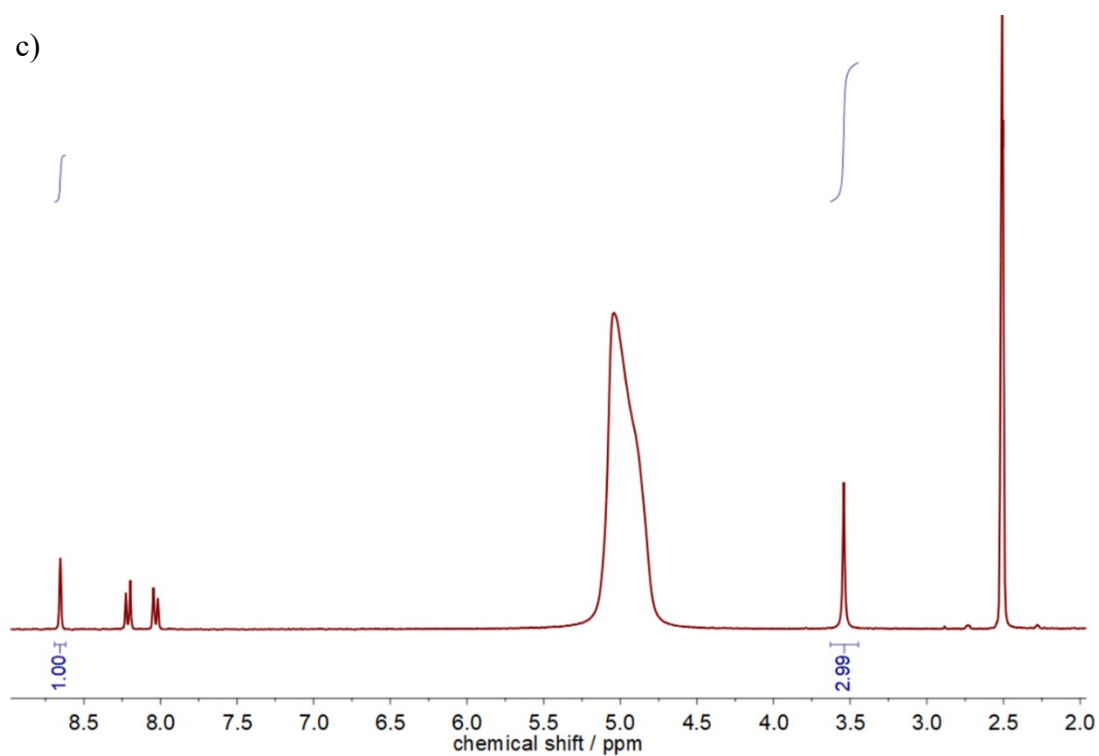

Fig. S8.1 a-b)  $^1\text{H}$  NMR spectra of **2a** (b) and **2b** (c).

Table S8.1 Ratio of 2,6-ndc to dabco in **1a**, **2a**, and **2b** found after desolvation. The ratios were calculated from  $^1\text{H}$  NMR spectra shown in Fig. S8.1 and obtained from the digested samples.

| Ratio                  | <b>1a</b> | <b>2a</b> | <b>2b</b> |
|------------------------|-----------|-----------|-----------|
| <b>2,6-ndc : dabco</b> | 1:0.95    | 1:0.92    | 1:0.99    |

## References

1. N. Klein, H. C. Hoffmann, A. Cadiou, J. Getzschmann, M. R. Lohe, S. Paasch, T. Heydenreich, K. Adil, I. Senkovska, E. Brunner and S. Kaskel *J. Mater. Chem.*, 2012, **22**, 10303.
2. N. Klein 2012, *PhD thesis*, Department of Inorganic Chemistry, Technische Universität Dresden.
